# Supplementary material
Source: PubMed Central journal article supplement (PMC5892570)
Supplement: supp_RA117.000443_133156_1_supp_51916_p2b2qq.pdf [file supp_RA117.000443_133156_1_supp_51916_p2b2qq.pdf]

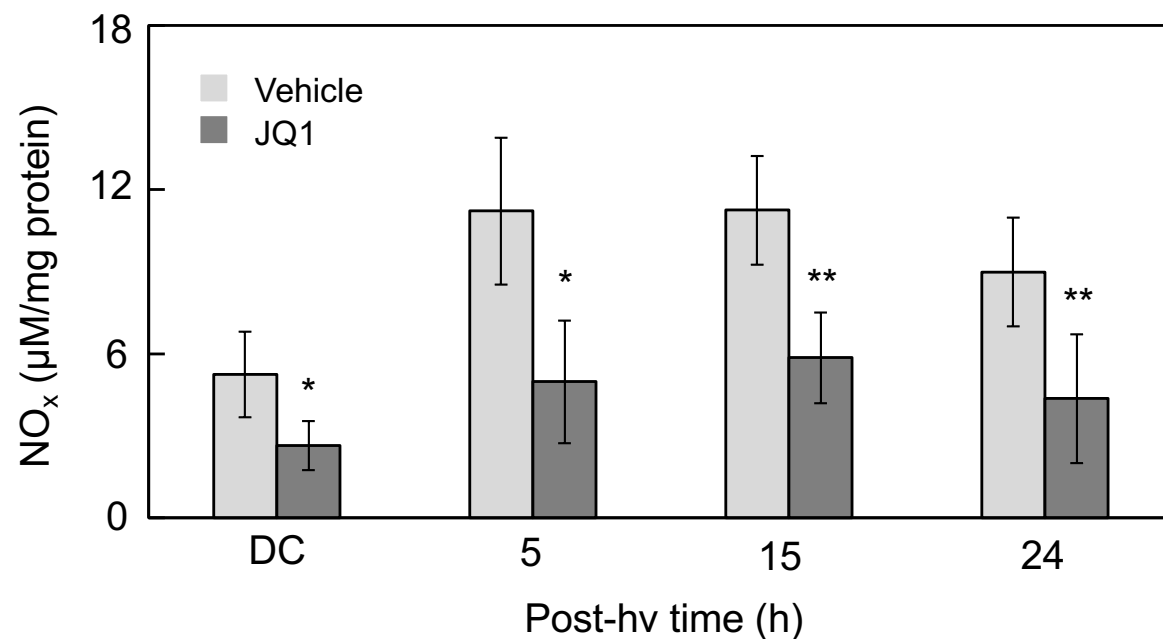

**Figure S1:** NO<sub>x</sub> (nitrite/nitrate) levels in photostressed U87 cells. Sub-confluent cells in a transparent 96-well plate were sensitized with ALA-induced PpIX and then irradiated (fluence ~1 J/cm<sup>2</sup>). Immediately thereafter, the cells were washed and overlaid with fresh medium containing 0.3 μM JQ1 in DMSO or DMSO alone (vehicle control). After the indicated dark-incubation times, the medium was recovered and analyzed for total NO<sub>x</sub> by the Griess assay. Plotted values (standardized to total cellular protein in each case) are means ± SEM (n=4); \*P<0.01 vs. control; \*\*P<0.05 vs. control.

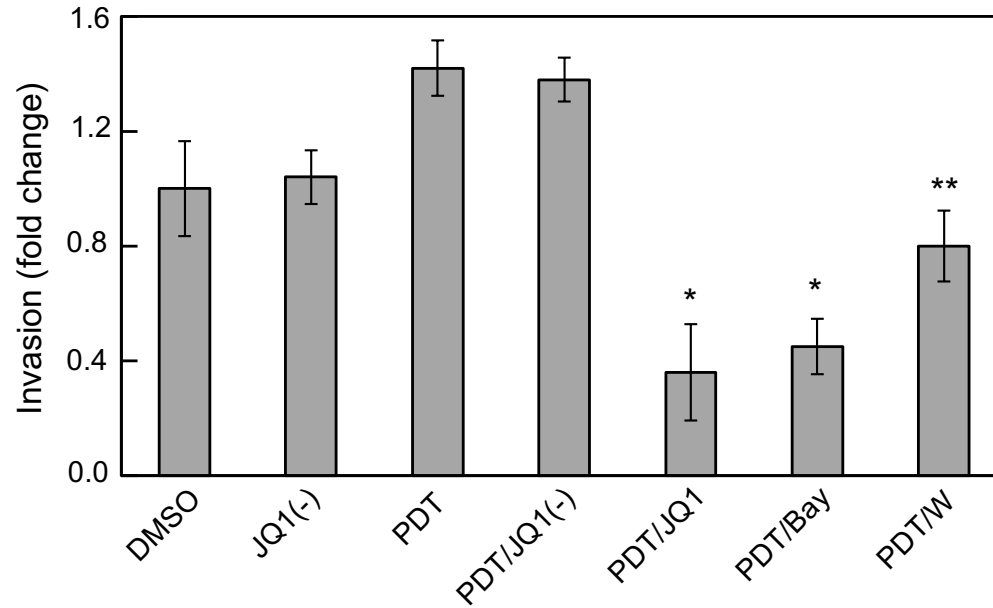

**Figure S2.** JQ1-inhibitable hyper-invasiveness of glioblastoma U251 cells that withstood a photodynamic challenge. U251 cells were pre-incubated with ALA in the dark and then irradiated (1 J/cm<sup>2</sup>). These cells, along with non-irradiated controls, were then harvested and assessed for invasiveness in the absence *vs.* presence of 0.3  $\mu$ M JQ1, 0.3  $\mu$ M JQ1(-), 5  $\mu$ M Bay11, or 25  $\mu$ M 1400W. DMSO served as a vehicle control for JQ1 and JQ1(-). Cells that had traversed the Matrigel filter after 24 h were recovered by centrifugation and quantified by CCK-8 assay. Other details were as described for Fig. 9A. Plotted values are means  $\pm$  SEM (n=3); \*P<0.001 *vs.* PDT; \*\*P<0.01 *vs.* PDT.
